# Supplementary material for: Dry reforming of methane over alumina-supported rhodium catalysts at low temperatures under visible and near-infrared light
Source: Royal Society of Chemistry journal article supplement (doi:10.1039/d0cy00858c), 2020-01-01
Supplement: d0cy00858c1.pdf [file d0cy00858c1.pdf]

## Supporting Information

### **Dry reforming of methane over alumina-supported rhodium catalysts at low temperatures under visible and near-infrared light**

**Daichi Takami,<sup>a</sup> Akira Yamamoto<sup>\*a,b</sup> and Hisao Yoshida<sup>\*a,b</sup>**

<sup>a</sup> Graduate School of Human and Environmental Studies, Kyoto University,  
Kyoto, 606-8501, Japan.

<sup>b</sup> Elements Strategy Initiative for Catalysts and Batteries (ESICB), Kyoto  
University, Kyoto 615-8520, Japan.

E-mail: yamamoto.akira.2a@kyoto-u.ac.jp

yoshida.hisao.2a@kyoto-u.jp

## Material and Preparation

Al<sub>2</sub>O<sub>3</sub> ( $\gamma$ -phase, 170 m<sup>2</sup> g<sup>-1</sup>, JRC-ALO-7, the Catalysis Society of Japan) was used as received without further purification. Precursors of the Ni and Rh metals were as follows; Ni(NO<sub>3</sub>)<sub>2</sub>·6H<sub>2</sub>O (Wako, 99%), Rh(NO<sub>3</sub>)<sub>3</sub>·nH<sub>2</sub>O (Tanaka Kikinzoku Kogyo K. K.). The metal precursor was impregnated on the Al<sub>2</sub>O<sub>3</sub> support using ion-exchanged water (100 ml) and the suspension was heated at 353 K to dryness under magnetically stirring. The powder was dried at 373 K overnight, and calcined at 673 K for 2 h to obtain Al<sub>2</sub>O<sub>3</sub>-supported Rh or Ni catalysts. They were referred to as Rh(*x*)/Al<sub>2</sub>O<sub>3</sub> and Ni(*y*)/Al<sub>2</sub>O<sub>3</sub>, where *x* and *y* are the weight percentages of Rh and Ni, respectively.

## Photocatalytic activity test

Activity test of the photo-assisted DRM reaction was carried out using a fixed-bed flow reactor as described in our previous study<sup>1</sup>. Before the activity test, the sample powder was pelletized and crashed into 300–710  $\mu$ m. The catalyst granules of Ni/Al<sub>2</sub>O<sub>3</sub> or Rh/Al<sub>2</sub>O<sub>3</sub> (0.3 g) were filled into a quartz reactor (2 cm  $\times$  2 cm  $\times$  1 mm, Fig. S1). Before the activity test, the sample was oxidized by 100%O<sub>2</sub> gas (total flow rate: 5 ml min<sup>-1</sup>) at 723 K for 30 min to remove organic impurities from the catalyst surface, and then reduced by 10%H<sub>2</sub>/Ar gas (total flow rate: 20 ml min<sup>-1</sup>) at 723 K for 30 min. After the pretreatment, a reactant gas (typically 10%CO<sub>2</sub>/10%CH<sub>4</sub>/Ar, total flow rate: 200 ml min<sup>-1</sup>) was flowed into the reactor in the dark at the given temperatures (typically, 473 K). After 30 min, light irradiation was started using a 300 W Xe lamp (Excelitas Technologies, PE300BUV, light intensity: 190 mW cm<sup>-2</sup> in the range of 254 $\pm$ 10 nm). For the vis–NIR light irradiation, a long-pass filter (Y-43, Toshiba Co. Ltd.,  $\lambda$  > 430 nm, Fig. S2) was used to remove the UV light. The outlet gas was analysed by online gas chromatography with a thermal conductivity detector (Shimadzu, GC-8A) using a Shincarbon ST column. The conversion, selectivity, and carbon balance in the DRM reaction were calculated from the following equations:

$$\text{Conversion of CO}_2 (\%) = (1 - [\text{CO}_2]_{\text{out}} / [\text{CO}_2]_{\text{in}}) \times 100$$

$$\text{Conversion of CH}_4 (\%) = (1 - [\text{CH}_4]_{\text{out}} / [\text{CH}_4]_{\text{in}}) \times 100$$

$$\text{Carbon balance } (\%) = ([\text{CO}]_{\text{out}} + [\text{CO}_2]_{\text{out}} + [\text{CH}_4]_{\text{out}}) / ([\text{CO}_2]_{\text{in}} + [\text{CH}_4]_{\text{in}}) \times 100$$

where [X]<sub>in</sub> and [X]<sub>out</sub> represent the molar concentrations of X (X = CO<sub>2</sub>, CH<sub>4</sub> or CO) in the inlet and outlet gases, respectively.

For the activity test of the CO<sub>2</sub> hydrogenation, a reactant gas (10%CO<sub>2</sub>/10%H<sub>2</sub>/Ar, total flow rate: 200 ml min<sup>-1</sup>) was flowed into the reactor. The other experimental procedures of the CO<sub>2</sub> hydrogenation reaction were the same as the activity test in the photo-assisted DRM reaction except for the reactant gas. The conversion, selectivity, and carbon balance in the CO<sub>2</sub> hydrogenation reaction were calculated from the following equations:

$$\text{Conversion of CO}_2 (\%) = (1 - [\text{CO}_2]_{\text{out}} / [\text{CO}_2]_{\text{in}}) \times 100$$

$$\text{Conversion of H}_2 (\%) = (1 - [\text{H}_2]_{\text{out}} / [\text{H}_2]_{\text{in}}) \times 100$$

$$\text{Selectivity to CH}_4 (\%) = [\text{CH}_4]_{\text{out}} / ([\text{CO}]_{\text{out}} + [\text{CH}_4]_{\text{out}}) \times 100$$

$$\text{Carbon balance (\%)} = ([\text{CO}]_{\text{out}} + [\text{CO}_2]_{\text{out}} + [\text{CH}_4]_{\text{out}}) / ([\text{CO}_2]_{\text{in}}) \times 100$$

where [Y]<sub>in</sub> and [Y]<sub>out</sub> represent the molar concentrations of Y (Y = CO<sub>2</sub>, H<sub>2</sub>, CH<sub>4</sub> or CO) in the inlet and outlet gases, respectively.

### Characterization

UV-vis-NIR diffuse reflectance spectra (UV-vis-NIR DRS) were recorded on a V-570 instrument (JASCO, Japan) using the barium sulfate (BaSO<sub>4</sub>) plate as a reference. Prior to the measurement, the sample was diluted 10 times with BaSO<sub>4</sub>. X-ray diffraction (XRD) pattern was obtained using the powder sample on an X-ray diffractometer (LabX XRD-6000, Shimadzu, Japan) with Cu K $\alpha$  radiation. The CO pulse adsorption experiment was used to determine the dispersion and average particle size of Rh and Ni particles deposited on the Al<sub>2</sub>O<sub>3</sub> support. Thermogravimetry and differential thermal analysis (TG-DTA) were performed on a Rigaku Thermo plus TG 8120 apparatus at a heating rate of 10 K min<sup>-1</sup> under a dry air flow condition (200 mL min<sup>-1</sup>) using Pt pans.

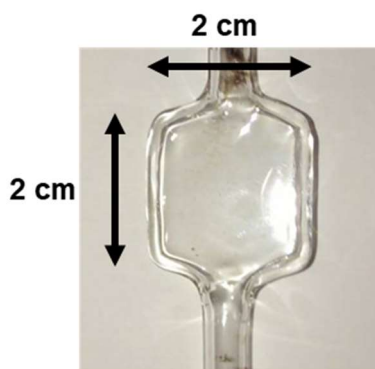

**Fig. S1** The quartz reactor used for the catalytic activity test.

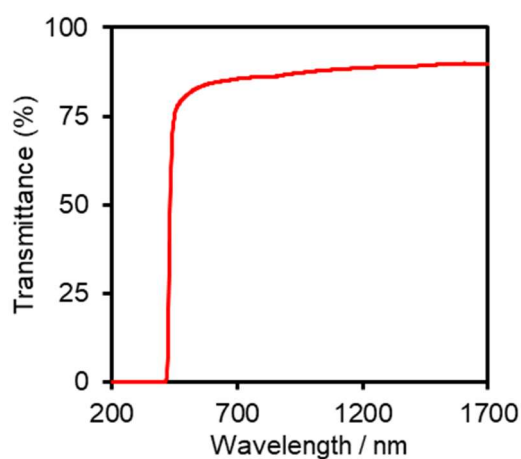

**Fig. S2** Transmission property of a Y-43 long-pass filter used in the photo-assisted DRM reaction. The spectrum was obtained in a transmission mode by the UV–vis–NIR absorption spectrometer.

### Estimation of metal particle sizes by the CO adsorption experiments

**Table S1** Metal particle sizes estimated by the CO adsorption experiments.

| Catalyst                                         | Metal particle size ( $d$ ) / nm |                    |                     |                     |                     |
|--------------------------------------------------|----------------------------------|--------------------|---------------------|---------------------|---------------------|
|                                                  | 1 wt% <sup>a</sup>               | 5 wt% <sup>a</sup> | 15 wt% <sup>a</sup> | 25 wt% <sup>a</sup> | 50 wt% <sup>a</sup> |
| Rh( $x$ )/Al <sub>2</sub> O <sub>3</sub>         | 0.2                              | – <sup>b</sup>     | 1.0                 | 1.6                 | – <sup>b</sup>      |
| Ni( $y$ )/Al <sub>2</sub> O <sub>3</sub>         | – <sup>b</sup>                   | 6.5                | 6.3                 | 7.9                 | 19                  |
| Rh( $x$ )/Al <sub>2</sub> O <sub>3</sub> _C1073K | – <sup>b</sup>                   | – <sup>b</sup>     | – <sup>b</sup>      | 6.7                 | – <sup>b</sup>      |

<sup>a</sup> Loading of metal ( $x$  or  $y$ ). <sup>b</sup> Sample was not prepared.

### Carbon deposition during the reaction

We performed TG-DTA of the Rh(25)/Al<sub>2</sub>O<sub>3</sub> catalyst after the reaction for 5 h under vis–NIR light (Fig. S3). The weight loss observed around 340 K should be derived from desorption of water. Besides, the weight loss derived from the coke was not observed clearly.

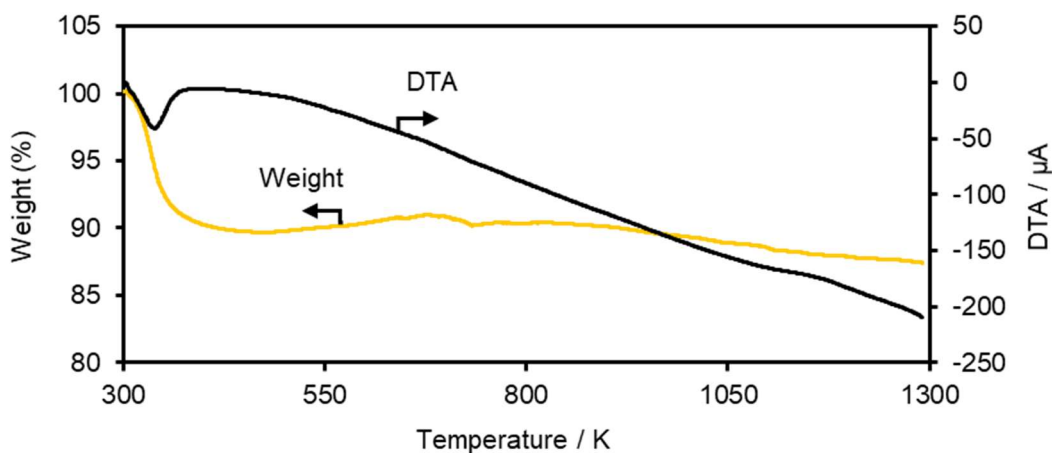

Fig. S3 TG-DTA profiles of the Rh(25)/Al<sub>2</sub>O<sub>3</sub> catalysts after the reaction for 5 h.

### Apparent activation energy with and without light irradiation

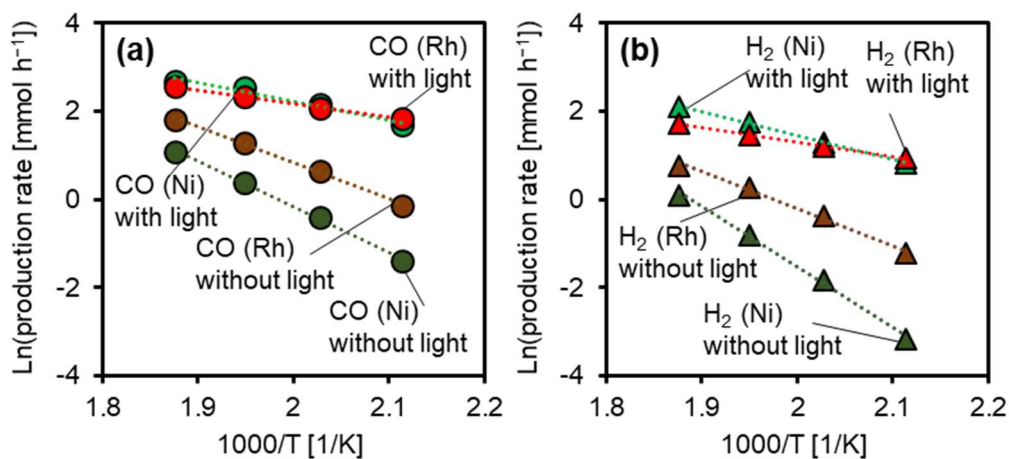

Fig. S4 Arrhenius plots for the production rates of CO (a) and H<sub>2</sub> (b) over the Rh(25)/Al<sub>2</sub>O<sub>3</sub> and Ni(25)/Al<sub>2</sub>O<sub>3</sub> samples with and without vis–NIR light. The range of external temperature used in the Arrhenius plots: 473–533 K.

**Table S2** Apparent activation energies on the Rh(25)/Al<sub>2</sub>O<sub>3</sub> and Ni(25)/Al<sub>2</sub>O<sub>3</sub> catalysts with and without vis–NIR light.

| Catalyst                              | Light <sup>a</sup> | $E_a^b$ / kJ mol <sup>-1</sup> |                |
|---------------------------------------|--------------------|--------------------------------|----------------|
|                                       |                    | CO                             | H <sub>2</sub> |
| Rh(25)/Al <sub>2</sub> O <sub>3</sub> | Vis–NIR            | 25.5                           | 27.3           |
| Rh(25)/Al <sub>2</sub> O <sub>3</sub> | Dark               | 68.1                           | 69.3           |
| Ni(25)/Al <sub>2</sub> O <sub>3</sub> | Vis–NIR            | 35.5                           | 45.0           |
| Ni(25)/Al <sub>2</sub> O <sub>3</sub> | Dark               | 86.9                           | 114            |

<sup>a</sup> Light source: a 300 W Xe lamp. Vis–NIR:  $\lambda > 430$  nm. Dark: without irradiation. <sup>b</sup> The range of external temperature used in the calculation of the activation energy: 473–533 K

### Surface temperature measurement

We measured the surface temperature of the reactor under vis–NIR irradiation by an infrared thermometer (testo 835-T1, Testo SE & Co. KGaA) at the external temperature of 473K. The surface temperatures of the Rh(25)/Al<sub>2</sub>O<sub>3</sub>, Ni(25)/Al<sub>2</sub>O<sub>3</sub>, and Rh(25)/Al<sub>2</sub>O<sub>3</sub>\_C1073K samples were 510 K, 528 K, and 532 K, which were higher than that of the Al<sub>2</sub>O<sub>3</sub> sample (468 K), indicating the increase of the temperature is due to the vis–NIR light absorption of the supported metal particles.

**Table S3** Surface temperatures measured by the infrared thermometer under the reaction condition.

| Catalyst                                      | Surface temperature / K |                    |                    |                    |
|-----------------------------------------------|-------------------------|--------------------|--------------------|--------------------|
|                                               | 473 K <sup>a</sup>      | 493 K <sup>a</sup> | 513 K <sup>a</sup> | 533 K <sup>a</sup> |
| Rh(25)/Al <sub>2</sub> O <sub>3</sub>         | 510                     | 528                | 550                | 573                |
| Ni(25)/Al <sub>2</sub> O <sub>3</sub>         | 529                     | 551                | 568                | 587                |
| Rh(25)/Al <sub>2</sub> O <sub>3</sub> _C1073K | 532                     | 553                | 568                | 597                |
| Al <sub>2</sub> O <sub>3</sub>                | 468                     | 488                | 508                | 531                |

<sup>a</sup> The external temperature controlled by an external heater and a thermocouple.

## Characterizations of Rh(25)/Al<sub>2</sub>O<sub>3</sub>\_C1073K

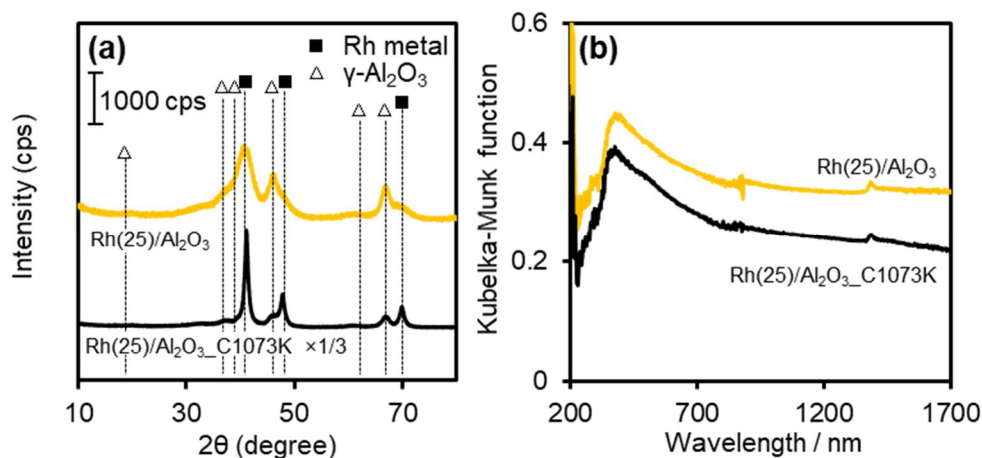

**Fig. S5** XRD pattern (a) and UV–vis–NIR diffuse reflectance absorption spectra (b) of the Rh(25)/Al<sub>2</sub>O<sub>3</sub> and Rh(25)/Al<sub>2</sub>O<sub>3</sub>\_C1073K samples. Before the measurements, the samples were reduced at 723 K under 10%H<sub>2</sub>/Ar. For the UV–vis–NIR absorption experiment, the samples were 10 times diluted with a barium sulphate powder.

## Turnover frequency

**Table S4** Turnover frequency (TOF) in the photo-assisted DRM reaction over the Ni(25)/Al<sub>2</sub>O<sub>3</sub> and Rh(25)/Al<sub>2</sub>O<sub>3</sub>\_C1073K samples calculated from the production rates of CO and H<sub>2</sub> at 473 K with and without vis–NIR light.

| Catalyst                                      | Light <sup>a</sup> | TOF <sup>b</sup> / min <sup>-1</sup> |                |
|-----------------------------------------------|--------------------|--------------------------------------|----------------|
|                                               |                    | CO                                   | H <sub>2</sub> |
| Ni(25)/Al <sub>2</sub> O <sub>3</sub>         | Vis–NIR            | 0.73                                 | 0.31           |
| Ni(25)/Al <sub>2</sub> O <sub>3</sub>         | Dark               | 0.41                                 | 0.15           |
| Rh(25)/Al <sub>2</sub> O <sub>3</sub> _C1073K | Vis–NIR            | 0.86                                 | 0.51           |
| Rh(25)/Al <sub>2</sub> O <sub>3</sub> _C1073K | Dark               | 0.40                                 | 0.21           |

<sup>a</sup> Light source: a 300 W Xe lamp. Vis–NIR:  $\lambda > 430$  nm. Dark: without irradiation. <sup>b</sup> Turnover frequency at the external temperature of 473 K.

### Effect of the reaction temperature

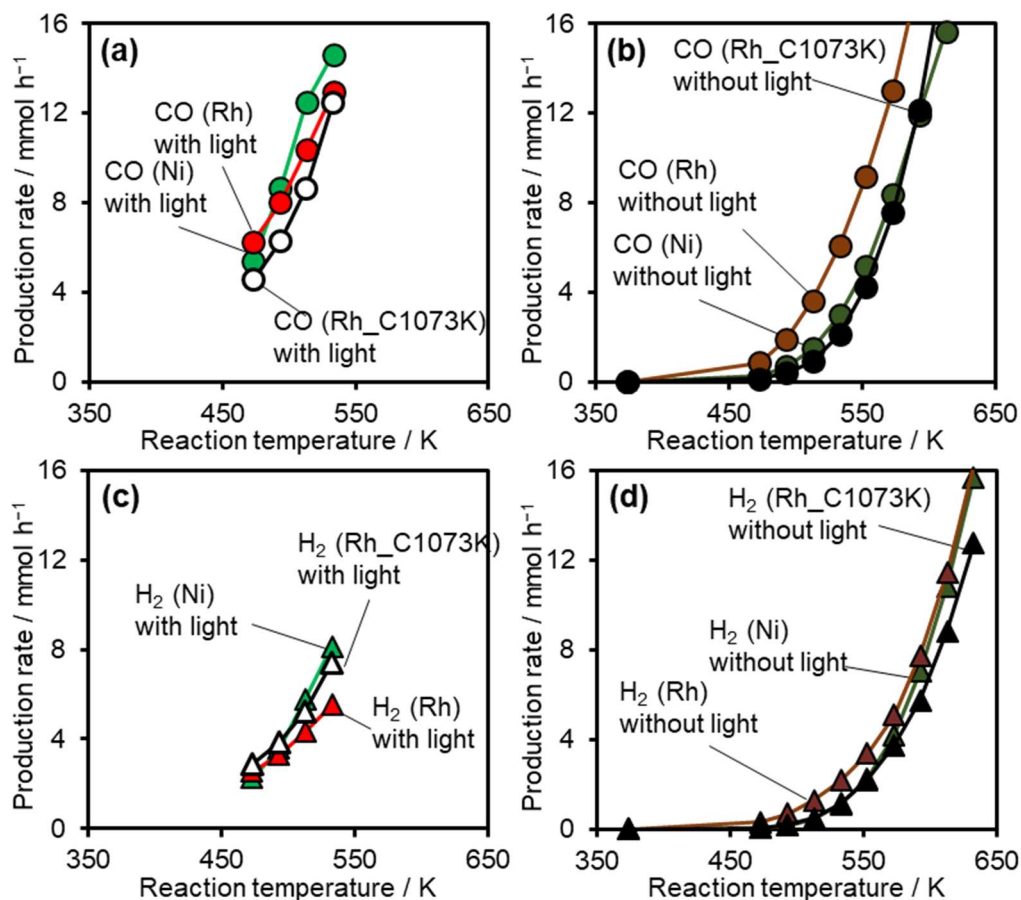

**Fig. S6** Effect of the reaction temperature on the production rates of CO and H<sub>2</sub> over the Rh(25)/Al<sub>2</sub>O<sub>3</sub>, Ni(25)/Al<sub>2</sub>O<sub>3</sub> and Rh(25)/Al<sub>2</sub>O<sub>3</sub>\_C1073K samples with and without vis-NIR light. Feed gas: 10%CO<sub>2</sub>/10%CH<sub>4</sub>/Ar. Total flow rate: 200 ml min<sup>-1</sup>. The temperatures employed here were the external temperature measured by the thermocouple.

### References

- 1 D. Takami, Y. Ito, S. Kawaharasaki, A. Yamamoto, H. Yoshida, *Sustainable Energy Fuels*, 2019, **3**, 2968–2971.
